# Supplementary material
Source: PubMed Central journal article supplement (PMC1409722)

Supplementary Figure 1 - Kneussel  
(Loebrich et al.)

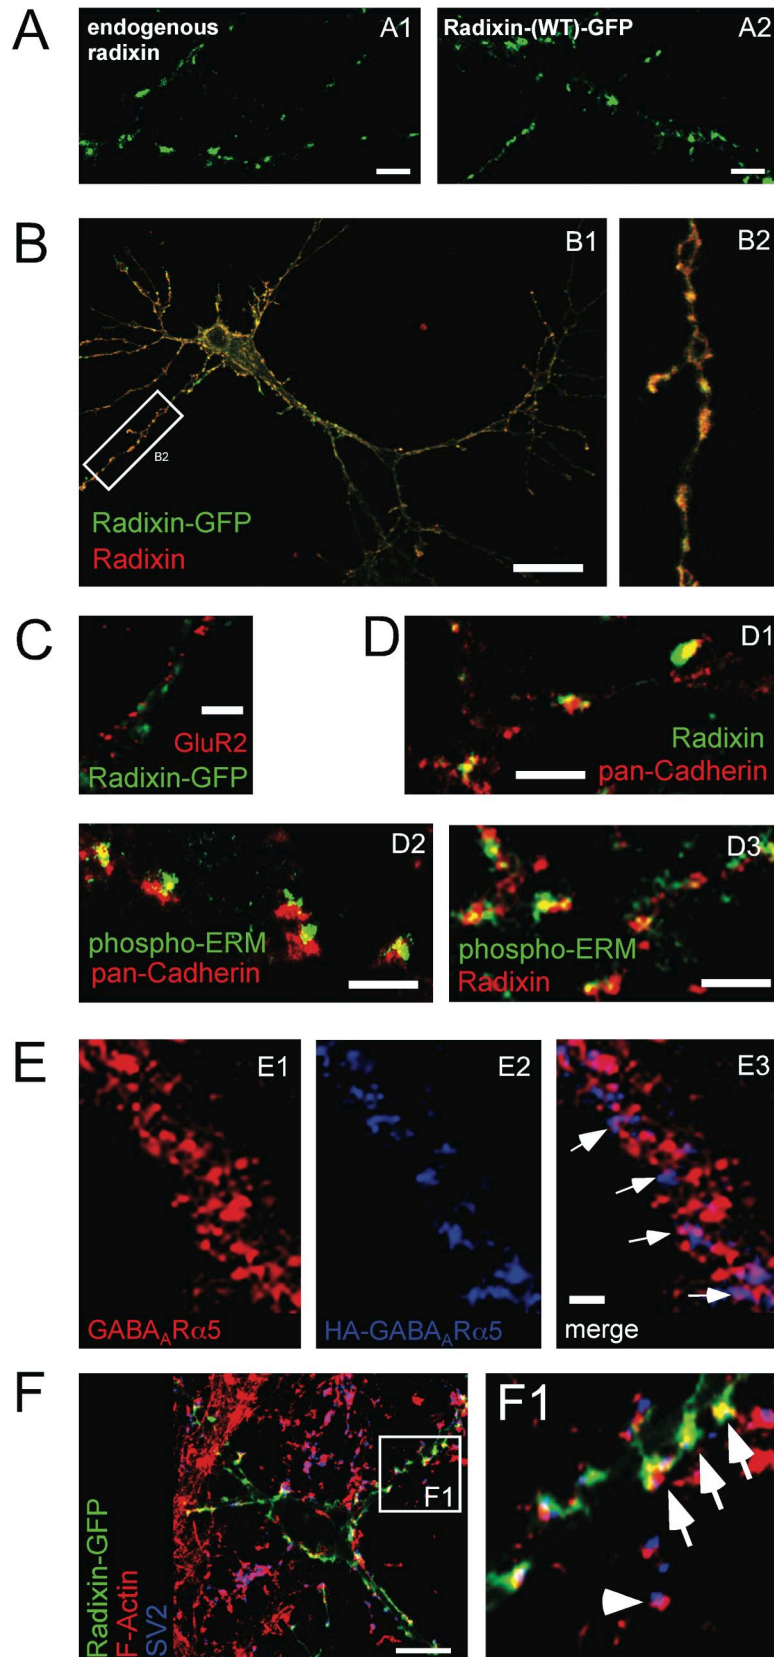

Supplement: 7600995s2.pdf [file 7600995s2.pdf]

Supplementary Figure 2 - Kneussel  
(Loebrich et al.)

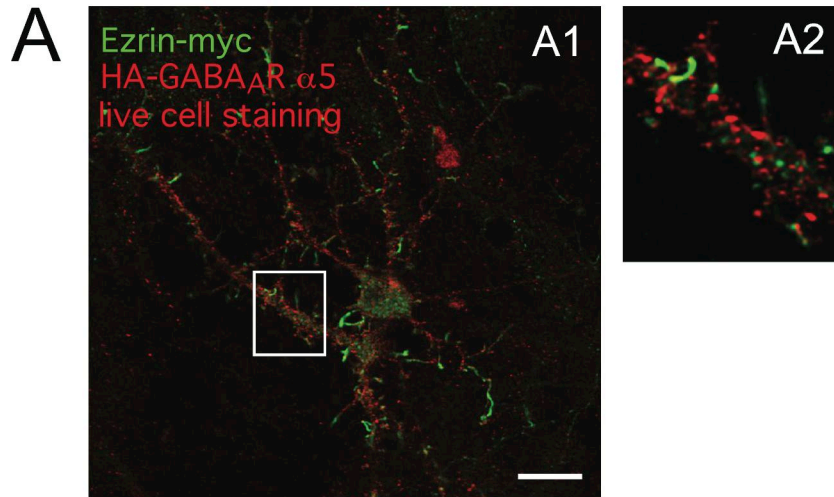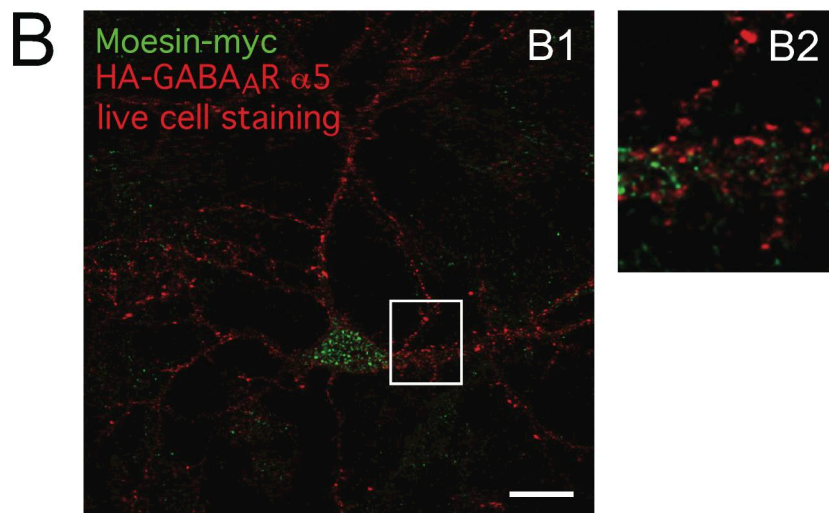

Supplement: 7600995s3.pdf [file 7600995s3.pdf]

Supplementary Figure 3 - Kneussel  
(Loebrich et al.)

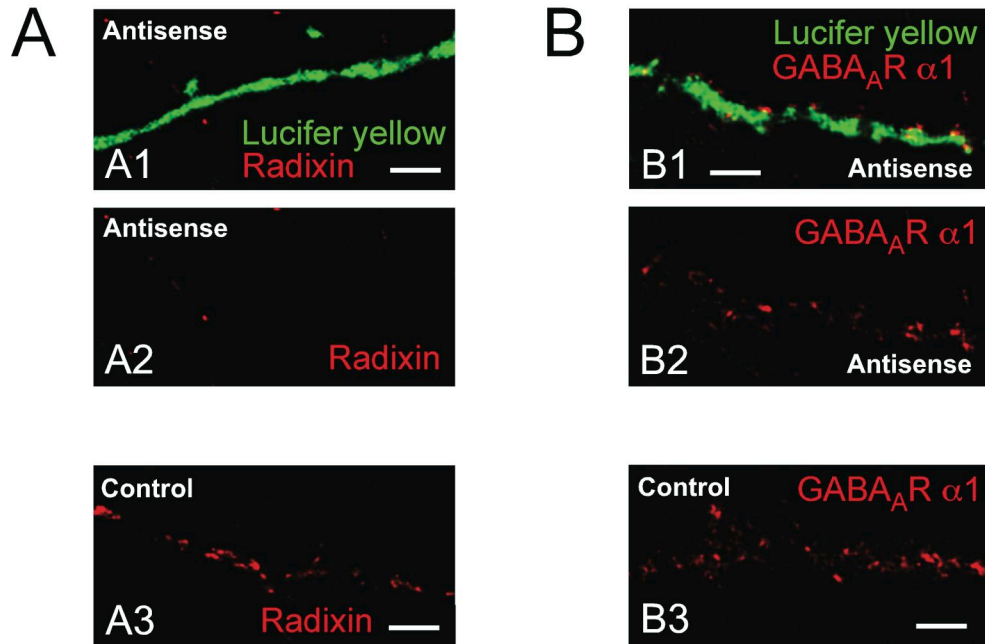

Supplement: 7600995s4.pdf [file 7600995s4.pdf]

Supplementary Figure 4 - Kneussel  
(Loebrich et al.)

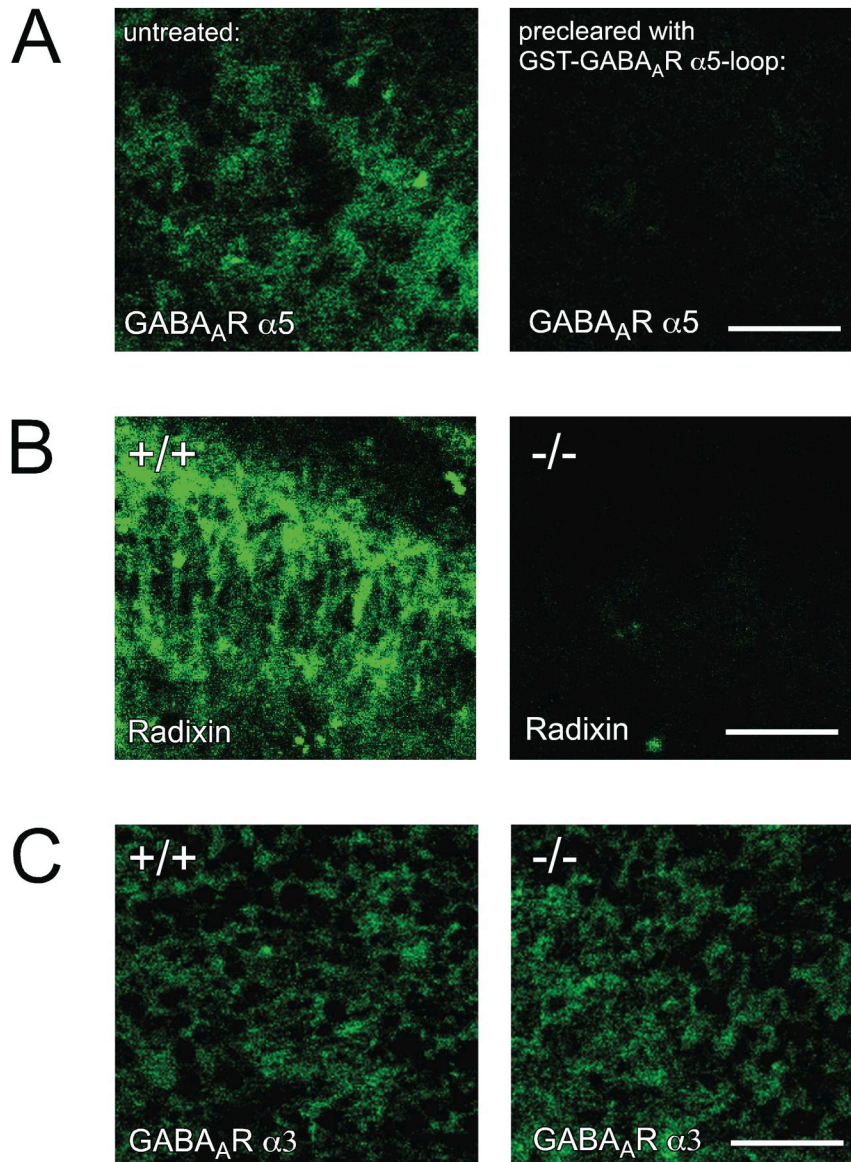

Supplement: 7600995s5.pdf [file 7600995s5.pdf]

Supplementary Figure 5 - Kneussel  
(Loebrich et al.)

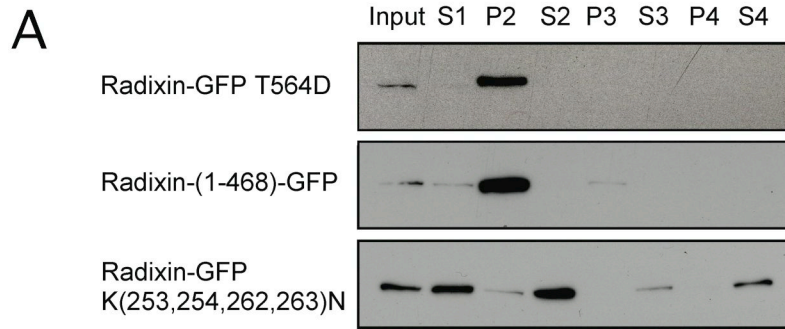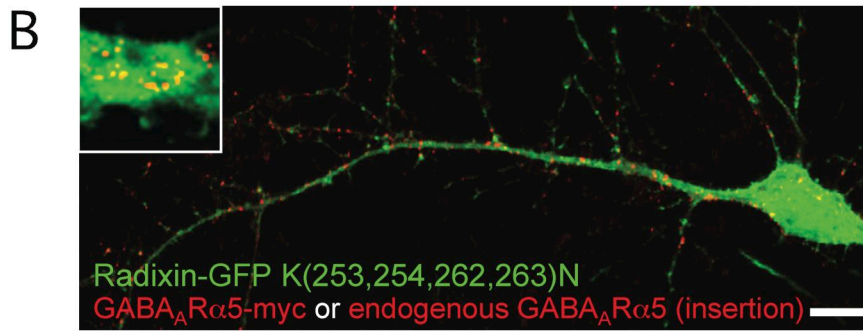

Supplement: 7600995s6.pdf [file 7600995s6.pdf]

Supplementary Figure 6 - Kneussel  
(Loebrich et al.)

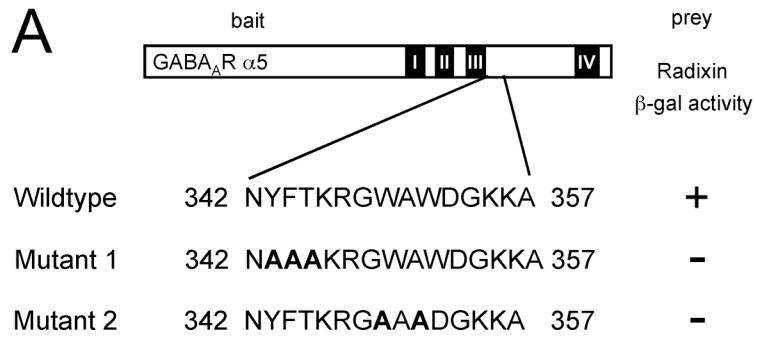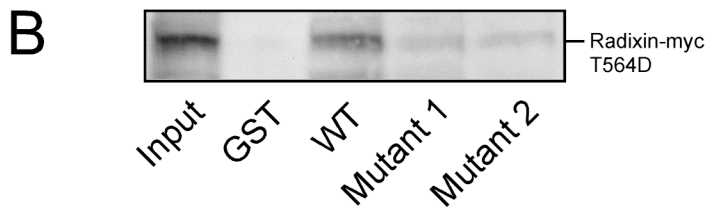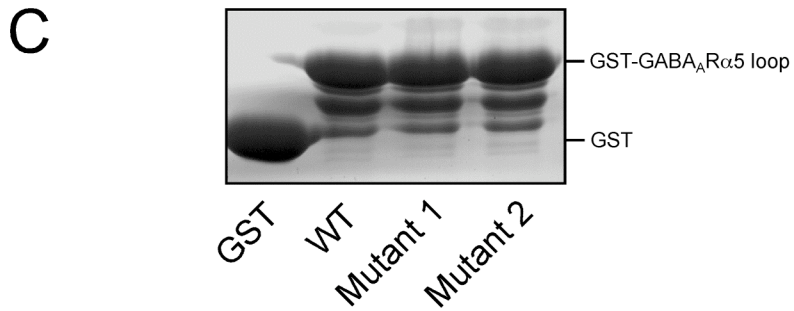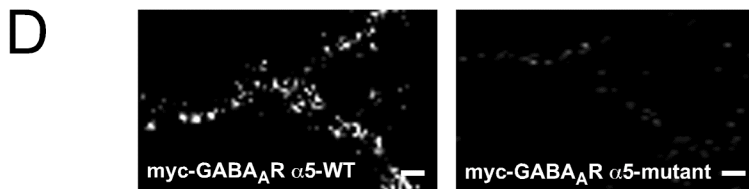

Supplement: 7600995s7.pdf [file 7600995s7.pdf]
